# Supplementary material
Source: publisher figshare collection journal article supplement (https://aacr.figshare.com/articles/dataset/_/23676036)
Supplement: Supplementary file 1 [file 41550156]

## **Supplementary Fig. S2. Pharmacokinetics.**

The blue line shows the predicted blood concentration according to calculation, and the red circle shows the observed blood concentration.
